# Supplementary material for: CD16+NK-92 and anti-CD123 monoclonal antibody prolongs survival in primary human acute myeloid leukemia xenografted mice
Source: PubMed Central journal article supplement — Haematologica. 2018 Jul 5;103(10):1720–9. doi: 10.3324/haematol.2017.187385 (PMC6165813; doi:10.3324/haematol.2017.187385), 2018-10
Supplement: 2017_187385-Disclosures_and_Contributions.pdf [file 2017_187385-Disclosures_and_Contributions.pdf]

Haematologica  
HAEMATOL/2017/187385  
Version 3

CD16+NK-92 and anti-CD123 monoclonal antibody prolongs survival in primary human acute myeloid leukemia xenografted mice

Brent A. Williams, Xing-Hua Wang, Jeffrey V. Leyton, Sonam Maghera, Bishoy Deif, Raymond M. Reilly, Mark D. Minden, and Armand Keating

Disclosures: The Keating Laboratory has received funding from Conkwest/Nantkwest for laboratory research unrelated to the work presented here.

Contributions: BW designed and conducted experiments and wrote the first draft of the manuscript. BD, X-HW, SM, JL, contributed to experimental design and conducted experiments. MM, RMR contributed to experimental design and supplied key reagents and cells. AK supervised the research project and contributed to experimental design. All authors reviewed and edited the final draft of the manuscript.
